# Supplementary material for: The Role of Extracellular Vesicles in the Development of a Cancer Stem Cell Microenvironment Niche and Potential Therapeutic Targets: A Systematic Review
Source: MDPI journal article supplement (doi:10.3390/cancers13102435), 2021-05-18
Supplement: s1 [file s1]

# The Role of Extracellular Vesicles in the Development of a Cancer Stem Cell Microenvironment Niche and Potential Therapeutic Targets: A Systematic Review

Thomas J Brown and Victoria James

**Table S1.** Summary of studies on the content of EVs in cancer stem cells.

| Extracellular Vesicle Cargo         |                                                                                                                |                                                                                                                                                              |                              |                  |                                                               |                                                                                                                                                                                                                                                      |
|-------------------------------------|----------------------------------------------------------------------------------------------------------------|--------------------------------------------------------------------------------------------------------------------------------------------------------------|------------------------------|------------------|---------------------------------------------------------------|------------------------------------------------------------------------------------------------------------------------------------------------------------------------------------------------------------------------------------------------------|
| Author, Year                        | Title                                                                                                          | Aim                                                                                                                                                          | Cancer                       | Biological focus | Samples                                                       | Conclusion                                                                                                                                                                                                                                           |
| Hardin <i>et al.</i> , 2018 [1]     | Thyroid cancer stem-like cell exosomes: regulation of EMT via transfer of lncRNAs                              | How exosomes lncRNAs facilitate the cancer cell stemness and the EMT process in the aggressive anaplastic thyroid carcinoma                                  | Anaplastic thyroid carcinoma | lncRNAs          | <i>In vitro</i><br>3D Cell Culture                            | Exosomes to communicate with and modulate adjacent and distant tumour microenvironment through the transfer of ncRNAs. Specifically, in the transfer of lncRNA, lincROR, inducing CSC or EMT                                                         |
| Donnarumma <i>et al.</i> , 2017 [2] | Cancer-associated fibroblasts release exosomal microRNAs that dictate an aggressive phenotype in breast cancer | To view the miRNA mediators within Cancer-associated fibroblasts exosomes that promote breast cancer stem cellness                                           | Breast cancer                | miRNAs           | <i>In vitro</i><br>3D Cell culture<br><i>In vivo</i><br>Human | miRs -21, -378e, and -143, found in exosomes promoted the stemness and EMT phenotype of breast cancer cells and CAFs regulate the development of an aggressive phenotype in breast cancer cells through exosome-mediated delivery of oncogenic miRs. |
| Razmkhah <i>et al.</i> , 2017 [3]   | Leukaemia microvesicles affect healthy hematopoietic stem cells                                                | Investigate the effect of leukaemia microvesicles on healthy umbilical cord blood hematopoietic stem cells to find evidence of cell information transferring | Leukaemia                    | miRNAs           | <i>In vitro</i><br>2D Cell culture<br><i>In vivo</i><br>Human | Leukaemia microvesicles are able to induce some effects on healthy hematopoietic stem cells such as promoting cell survival and some microRNAs deregulation, while stemness is maintained. miRNA 21 +29a                                             |

|                                        |                                                                                                                                     |                                                                                                                                                                                                                   |                 |         |                                    |                                                                                                                                 |
|----------------------------------------|-------------------------------------------------------------------------------------------------------------------------------------|-------------------------------------------------------------------------------------------------------------------------------------------------------------------------------------------------------------------|-----------------|---------|------------------------------------|---------------------------------------------------------------------------------------------------------------------------------|
| Ramteke <i>et al.</i> ,<br>2013<br>[4] | Exosomes secreted under hypoxia enhance invasiveness and stemness of prostate cancer cells by targeting adherens junction molecules | Investigating the role of exosomes from hypoxic PCA cells in enhancing the invasiveness and stemness of naïve PCA cells, as well as in promoting cancer-associated fibroblast phenotype in prostate stromal cells | Prostate cancer | Protein | <i>In vitro</i><br>3D cell culture | Hypoxic exosomes are loaded with unique proteins that could enhance invasiveness, stemness, and induce microenvironment changes |
|----------------------------------------|-------------------------------------------------------------------------------------------------------------------------------------|-------------------------------------------------------------------------------------------------------------------------------------------------------------------------------------------------------------------|-----------------|---------|------------------------------------|---------------------------------------------------------------------------------------------------------------------------------|

**Table S2.** Summary of studies on the pathways activated by CSC EV mediated communication.

| Activated Pathways                   |                                                                                                                                           |                                                                                                                                                                                  |                   |                                        |                                                                        |                                                                                                                                                                                                                                                                                                         |
|--------------------------------------|-------------------------------------------------------------------------------------------------------------------------------------------|----------------------------------------------------------------------------------------------------------------------------------------------------------------------------------|-------------------|----------------------------------------|------------------------------------------------------------------------|---------------------------------------------------------------------------------------------------------------------------------------------------------------------------------------------------------------------------------------------------------------------------------------------------------|
| Author, Year                         | Title                                                                                                                                     | Aim                                                                                                                                                                              | Cancer            | Pathway                                | Samples                                                                | Conclusion                                                                                                                                                                                                                                                                                              |
| Hwang <i>et al.</i> ,<br>2019<br>[5] | Tumor stem-like cell-derived exosomal RNAs prime neutrophils for facilitating tumorigenesis of colon cancer                               | the mechanism governing colorectal cancer CSC-regulated neutrophil expansion                                                                                                     | Colorectal cancer | NF-κB                                  | <i>In vitro</i><br>3D Cell culture<br><i>In vivo</i><br>Human<br>Mouse | Describes the heterogeneity of tumor exosomes and elucidates a unique behavior of tumor exosomal RNAs in the establishment of a pro-tumoral microenvironment through signaling axis.                                                                                                                    |
| Gu <i>et al.</i> ,<br>2016<br>[6]    | Exosomes derived from human mesenchymal stem cells promote gastric cancer cell growth and migration via the activation of the Akt pathway | To investigate the effects of MSC-ex on the malignant/stemness properties of gastric cancer cells                                                                                | Gastric Cancer    | protein kinase B/akt signaling pathway | <i>In vitro</i><br>2D Cell culture                                     | MSC-ex promoted the proliferative and metastatic potential of gastric cancer cells ex vivo via the induction of the epithelial-mesenchymal transition and stemness via the protein kinase B/akt signaling pathway                                                                                       |
| Liu <i>et al.</i> ,<br>2020<br>[7]   | Cancer associated fibroblasts-derived exosomes contribute to radioresistance through promoting colorectal cancer stem cells phenotype     | Investigate whether exosomes derived from CAFs (CAF-exosomes) are involved in mediating resistance to radiotherapy in colorectal cancer and to explore the underlying mechanism. | Colorectal cancer | TGF-β signaling pathway                | <i>In vitro</i><br>2D Cell culture<br><i>In vivo</i><br>Mouse          | CAFs promote stemness of CRC cells and thus increase radiation resistance. Exosomes derived from CAFs play a crucial role through activating TGF-β signaling pathway in this process.                                                                                                                   |
| Ren <i>et al.</i> ,<br>2018<br>[8]   | Carcinoma-associated fibroblasts promote the stemness and chemoresistance of colorectal cancer by transferring exosomal lncRNA H19.       | To investigate the molecular mediators within carcinoma associated fibroblasts exosomes, and how these promote stem cellness and chemoresistance                                 | Colorectal cancer | β-catenin pathway                      | <i>In vitro</i><br>2D Cell culture<br><i>In vivo</i><br>Mouse          | CAFs promote the stemness and chemoresistance of CRC by transferring exosomal H19. H19 activated the β-catenin pathway via acting as a competing endogenous RNA sponge for miR-141, while miR-141 inhibited the stemness of CRC cells. H19 expressed by CAFs of the colorectal tumor stroma contributes |

| to tumor development and chemoresistance |                                                                                                                                                                                                                |                                                                                                                                                                                                                                |                   |                                             |                                                                  |                                                                                                                                                                                                                                        |
|------------------------------------------|----------------------------------------------------------------------------------------------------------------------------------------------------------------------------------------------------------------|--------------------------------------------------------------------------------------------------------------------------------------------------------------------------------------------------------------------------------|-------------------|---------------------------------------------|------------------------------------------------------------------|----------------------------------------------------------------------------------------------------------------------------------------------------------------------------------------------------------------------------------------|
| Cheng <i>et al.</i> , 2019 [9]           | RAB27B-activated secretion of stem-like tumor exosomes delivers the biomarker miRNA-146a-5p, which promotes tumorigenesis and associates with an immunosuppressive tumor microenvironment in colorectal cancer | Elucidating miRNA mechanisms of tumor exosome-mediated stemness expansion                                                                                                                                                      | Colorectal cancer | B-catenin/Tcf-4-activated RAB27B expression | <i>In vitro</i> 3D Cell culture<br><i>In vivo</i> Human          | miRNA-146a-5p (miR-146a) in CRCSC exosomes promotes stem-like properties and tumorigenicity by targeting Numb in recipient CRC cells. Leading to increased neutrophils and decreased t cells in Colorectal cancer patients             |
| Mao <i>et al.</i> , 2017 [10]            | UBR2 Enriched in p53 Deficient Mouse Bone Marrow Mesenchymal Stem Cell-Exosome Promoted Gastric Cancer Progression via Wnt/ $\beta$ -Catenin Pathway                                                           | Investigate the regulation of ubiquitin protein ligase E3 component n-recogin 2 (UBR2) enriched in exosomes secreted by p53 deficient mouse bone marrow MSC (p53-/- mBMMSC) in gastric cancer progression in vivo and in vitro | Gastric cancer    | Wnt/ $\beta$ -catenin pathway               | <i>In vitro</i> 2D Cell culture<br><i>In vivo</i> Mouse          | p53-/- mBMMSC exosomes could deliver UBR2 to target cells and promote gastric cancer growth and metastasis by regulating Wnt/ $\beta$ -catenin pathway                                                                                 |
| Li and li 2018 [11]                      | Exosomes from BM-MSCs increase the population of CSCs via transfer of miR-142-3p                                                                                                                               | To elucidate how BM-MSCs influence the stemness of recipient colon cancer cells and how this is facilitated by exosome miRNA contents                                                                                          | Colon cancer      | Numb/Notch signaling pathway                | <i>In vitro</i> 2D Cell culture<br><i>In vivo</i> Mouse<br>Human | Findings indicate that BM-MSCs-derived exosomes promote colon cancer stem cell-like traits via increased miR-142-3p via the numb/notch signalling pathway                                                                              |
| Sun <i>et al.</i> , 2020 [12]            | Glioblastoma Stem Cell-Derived Exosomes Enhance Stemness and Tumorigenicity of Glioma Cells by Transferring Notch1 Protein                                                                                     | Investigate whether GSC exosomes could reprogramme non-GSC glioma cells into GSCs, and to explore its potential mechanism involved.                                                                                            | Glioblastoma      | Notch 1 signaling                           | <i>In vitro</i> 3D Cell culture                                  | GSC exosomes act as information carriers, mediated non-GSC glioma cell dedifferentiation into GSCs by delivering Notch1 protein through Notch1 signaling activation, and enhanced stemness and tumorigenicity of non-GSC glioma cells. |

Table S3. Summary of the studies in CSC EV directed therapeutics.

| CSC Targeted Therapeutics      |                                                                                                                                                 |                                                                                                                                         |                              |              |                                                                                |                                                                                                                                    |
|--------------------------------|-------------------------------------------------------------------------------------------------------------------------------------------------|-----------------------------------------------------------------------------------------------------------------------------------------|------------------------------|--------------|--------------------------------------------------------------------------------|------------------------------------------------------------------------------------------------------------------------------------|
| Author, Year                   | Title                                                                                                                                           | Aim                                                                                                                                     | Cancer                       | Therapeutic  | Samples                                                                        | Conclusion                                                                                                                         |
| Chen <i>et al.</i> , 2020 [13] | Ovatodiolide Suppresses Oral Cancer Malignancy by Down-Regulating Exosomal Mir-21/STAT3/ $\beta$ -Catenin Cargo and Preventing Oncogenic Trans- | Explored the role of cancer stem cell-derived extracellular vesicles (CSC_EVs) generated from CAL27 and SCC-15 OSCC cells in the devel- | Oral squamous cell carcinoma | Ovatodiolide | <i>In vitro</i> 3D Cell Culture<br>Primary Cell Culture<br>Additional Database | Findings show Preclinical evidence that OV treatment suppresses tumorigenesis and OSCC stemness, as well as normalizes the TME, by |

|                                     | formation of Normal Gingival Fibroblasts                                                                                                                                      | development of cisplatin (CDDP) resistance.                                                                                                                                            |                         |             |                                                                                                                       | reducing the oncogenic cargo in CSC-EVs                                                                                                                                                                                               |
|-------------------------------------|-------------------------------------------------------------------------------------------------------------------------------------------------------------------------------|----------------------------------------------------------------------------------------------------------------------------------------------------------------------------------------|-------------------------|-------------|-----------------------------------------------------------------------------------------------------------------------|---------------------------------------------------------------------------------------------------------------------------------------------------------------------------------------------------------------------------------------|
| Gernapudi <i>et al.</i> , 2015 [14] | Targeting exosomes from preadipocytes inhibits preadipocyte to cancer stem cell signaling in early-stage breast cancer                                                        | investigated the role of exosomes secreted from preadipocytes in regulating cancer cell behavior and tumor formation                                                                   | Breast cancer           | Shikonin    | <i>In vitro</i><br>2D Cell Culture<br>3D Cell Culture<br><i>In vivo</i><br>Mouse Models                               | miR-140/SOX2/SOX9 axis regulates differentiation, stemness, and migration in the tumor microenvironment. preadipocyte-derived exosomes promote tumorigenesis in vivo, with Treatment with shikonin inhibiting preadipocyte signaling. |
| Xing <i>et al.</i> , 2018 [15]      | Loss of XIST in breast cancer activates MSN-c-Met and reprograms microglia via exosomal microRNA to promote brain metastasis                                                  | Exploring the potential role and mechanisms by which lncRNAs found in EVs act in promoting the metastasis of breast cancer to the brain through cancer stem cellness                   | Breast cancer           | Fludarabine | <i>In vitro</i><br>2D Cell Culture<br><i>In vivo</i><br>Mouse Models<br>Human<br><i>Additional</i><br>Human databases | The loss of the lncRNA XIST promotes brain metastasis in breast cancer and identifies as a potential therapeutic agent that specifically eliminates XISTlow tumor cells in the breast and brain.                                      |
| Chuang <i>et al.</i> , 2020. [16]   | Preclinical Evidence of STAT3 Inhibitor Pacritinib Overcoming Temozolomide Resistance via Downregulating miR-21-Enriched Exosomes from M2 Glioblastoma-Associated Macrophages | To explore the role of signaling molecules such as cytokines, proteins, and microRNAs in promotion of stemness features and the ability of Pacritinib in targeting the CSC alterations | Glioblastoma multiforme | Pacritinib  | <i>In vitro</i><br>3D Cell Culture<br><i>In vivo</i><br>Mouse<br>Human                                                | Findings show potential of pacritinib alone or in combination with TMZ to suppress GBM tumorigenesis via modulating STAT3/miR-21/PDCD4 signaling.                                                                                     |

## References

1. Wang, J.; Li, D.; Cang, H.; Guo, B. Crosstalk between cancer and immune cells: Role of tumor-associated macrophages in the tumor microenvironment. *Cancer Med.* **2019**, *8*, 4709–4721.
2. Wieckowski, E.U.; Visus, C.; Szajnik, M.; Szczepanski, M.J.; Storkus, W.J.; Whiteside, T.L. Tumor-derived microvesicles promote regulatory T cell expansion and induce apoptosis in tumor-reactive activated CD8+ T lymphocytes. *J. Immunol.* **2009**, *183*, 3720–3730.
3. Hardin, H.; Helein, H.; Meyer, K.; Robertson, S.; Zhang, R.; Zhong, W.; Lloyd, R.V. Thyroid cancer stem-like cell exosomes: Regulation of EMT via transfer of lncRNAs. *Lab. Investig.* **2018**, *98*, 1133–1142.
4. Han, L.; Lam, E.W.-F.; Sun, Y. Extracellular vesicles in the tumor microenvironment: Old stories, but new tales. *Mol. Cancer* **2019**, *18*, 59.

5. Cheng, W.C.; Liao, T.T.; Lin, C.C.; Yuan, L.T.E.; Lan, H.Y.; Lin, H.H.; Teng, H.W.; Chang, H.C.; Lin, C.H.; Yang, C.Y. RAB27B-activated secretion of stem-like tumor exosomes delivers the biomarker microRNA-146a-5p, which promotes tumorigenesis and associates with an immunosuppressive tumor microenvironment in colorectal cancer. *Int. J. Cancer* **2019**, *145*, 2209–2224.
6. Razmkhah, F.; Soleimani, M.; Mehrabani, D.; Karimi, M.H.; Amini Kafi-abad, S.; Ramzi, M.; Irvani Saadi, M.; Kakoui, J. Leukemia microvesicles affect healthy hematopoietic stem cells. *Tumor Biol.* **2017**, *39*, 1010428317692234.
7. Hwang, W.-L.; Lan, H.-Y.; Cheng, W.-C.; Huang, S.-C.; Yang, M.-H. Tumor stem-like cell-derived exosomal RNAs prime neutrophils for facilitating tumorigenesis of colon cancer. *J. Hematol. Oncol.* **2019**, *12*, 1–17.
8. Liu, L.; Zhang, Z.; Zhou, L.; Hu, L.; Yin, C.; Qing, D.; Huang, S.; Qin, J.; Cai, X.; Chen, Y. Cancer associated fibroblasts-derived exosomes contribute to radioresistance through promoting colorectal cancer stem cells phenotype. *Exp. Cell Res.* **2020**, 111956.
9. Ramteke, A.; Ting, H.; Agarwal, C.; Mateen, S.; Somasagara, R.; Hussain, A.; Graner, M.; Frederick, B.; Agarwal, R.; Deep, G. Exosomes secreted under hypoxia enhance invasiveness and stemness of prostate cancer cells by targeting adherens junction molecules. *Mol. Carcinog.* **2015**, *54*, 554–565.
10. Li, H.; Li, F. Exosomes from BM-MSCs increase the population of CSCs via transfer of miR-142-3p. *Br. J. Cancer* **2018**, *119*, 744–755.
11. Gu, H.; Ji, R.; Zhang, X.; Wang, M.; Zhu, W.; Qian, H.; Chen, Y.; Jiang, P.; Xu, W. Exosomes derived from human mesenchymal stem cells promote gastric cancer cell growth and migration via the activation of the Akt pathway. *Mol. Med. Rep.* **2016**, *14*, 3452–3458.
12. Mao, J.; Liang, Z.; Zhang, B.; Yang, H.; Li, X.; Fu, H.; Zhang, X.; Yan, Y.; Xu, W.; Qian, H. UBR2 Enriched in p53 Deficient Mouse Bone Marrow Mesenchymal Stem Cell-Exosome Promoted Gastric Cancer Progression via Wnt/ $\beta$ -Catenin Pathway. *Stem Cells* **2017**, *35*, 2267–2279.
13. Ren, J.; Ding, L.; Zhang, D.; Shi, G.; Xu, Q.; Shen, S.; Wang, Y.; Wang, T.; Hou, Y. Carcinoma-associated fibroblasts promote the stemness and chemoresistance of colorectal cancer by transferring exosomal lncRNA H19. *Theranostics* **2018**, *8*, 3932.
14. Chen, J.-H.; Wu, A.T.; Bamodu, O.A.; Yadav, V.K.; Chao, T.-Y.; Tzeng, Y.-M.; Mukhopadhyay, D.; Hsiao, M.; Lee, J.-C. Ovatodiolide suppresses oral cancer malignancy by down-regulating exosomal mir-21/STAT3/ $\beta$ -catenin cargo and preventing oncogenic transformation of normal gingival fibroblasts. *Cancers* **2020**, *12*, 56.
15. Chuang, H.-Y.; Su, Y.-k.; Liu, H.-W.; Chen, C.-H.; Chiu, S.-C.; Cho, D.-Y.; Lin, S.-Z.; Chen, Y.-S.; Lin, C.-M. Preclinical evidence of STAT3 inhibitor pacritinib overcoming temozolomide resistance via downregulating miR-21-enriched exosomes from M2 glioblastoma-associated macrophages. *J. Clin. Med.* **2019**, *8*, 959.
16. Sun, Z.; Wang, L.; Zhou, Y.; Dong, L.; Ma, W.; Lv, L.; Zhang, J.; Wang, X. Glioblastoma Stem Cell-Derived Exosomes Enhance Stemness and Tumorigenicity of Glioma Cells by Transferring Notch1 Protein. *Cell. Mol. Neurobiol.* **2019**, *40*, 767–784.
